# Supplementary material
Source: PubMed Central journal article supplement (PMC5321654)
Supplement: NIHMS787305-supplement-Supplement.pdf [file NIHMS787305-supplement-Supplement.pdf]

# 1 Supplementary Material

## 2 1 Model selection for vital rate functions

### 3 1.1 Survival function: $s(x)$

4 In the main text, we parameterized the survival function  $s(x)$  using only individuals at 20 °C.  
5 As discussed in the main text, we chose to do this because individuals at this temperature  
6 were the only frogs that experienced mortality and we have substantial alternative evidence  
7 that the load-survival relationship between *R. muscosa* and *Bd* is not strongly temperature  
8 dependent. An alternative way that we could have parameterized the model was using all of  
9 the temperature data (4, 12, and 20 °C), but without including an effect of temperature. Given  
10 the link function  $\text{logit}[s(x)] = b_0 + b_1x$ , the parameters change from  $b_{0,\text{only } 20\text{ }^\circ\text{C}} = 11.5973$   
11 (SE: 4.74) to  $b_{0,\text{all temperatures}} = 11.8241$  (SE: 4.16) and  $b_{1,\text{only } 20\text{ }^\circ\text{C}} = -0.8873$  (SE: 0.45) to  
12  $b_{1,\text{all temperatures}} = -0.8605$  (SE: 0.39) (Figure 1). Despite these seemingly small differences, our  
13 elasticity analysis shows that small changes in this survival function can have large effects on  
14 the ability of *R. muscosa* to persist through an epizootic.

### 15 1.2 Growth Function: $G(x', x)$

16 We explored a variety of different models for the growth functions  $G(x', x)$  (Table 1, Figure 2).  
17 We did identify a more complex model than the model described in the manuscript that included  
18 a quadratic term for log zoospore size and an interaction between temperature and log zoospore  
19 load (Table 1; Model 6). We chose to use the linear model (Model 2) because 1) the quadratic  
20 model was highly specific for the data used to fit the model and did not give a generalizable *Bd*  
21 growth curve (e.g. exponential growth) and 2) for a given temperature the quadratic model did  
22 not allow for realistic extrapolation beyond the range of the data used to fit the model because  
23 for small log-zoospore loads the function predicts that increasing the log zoospore load at time  
24  $t$  decreases log zoospore load at time  $t + 1$  (i.e. when you are on the decreasing arm of the  
25 quadratic function, Figure 4). This is not a biologically reasonable pattern.

26 Despite these drawbacks, we ran the IPM analysis described in the paper using this quadratic  
27 growth model. We accounted for the zero derivative of the quadratic function by defining the  
28 growth function as the following piecewise function

$$G(x', x) \text{ if } \frac{d\mu(x, T)}{dx} > 0 \quad (1)$$

$$G(x', x_0) \text{ if } \frac{d\mu(x, T)}{dx} \leq 0 \quad (2)$$

29 where  $x_0$  is the log zoospore load at which the derivate of  $\mu(x, T) = b_0 + b_1x + b_2x^2 + b_3T + b_4xT$   
 30 is equal to 0. Analyzing the IPM with this growth function in place of the growth function  
 31 used in the main text provided qualitatively similar results: population growth rate decreased  
 32 with increasing temperature and the population growth rate was most sensitive to proportional  
 33 changes in the parameters in the growth function  $G(x', x)$  and the survival function  $s(x)$ . The  
 34 major difference between the two growth functions is that the IPM model with the quadratic  
 35 growth function predicted slower *Bd*-induced population declines than the linear model.

### 36 **1.3 Loss of infection function: $l(x)$**

37 The various models we fit for the loss of infection function  $l(x)$  are given in Table 2. Model 3  
 38 and Model 5 are the best models based on AIC. Model 5 in which temperature is a factor has a  
 39 marginally lower AIC than Model 3 in which temperature is continuous. A likelihood ratio test  
 40 shows that Model 5 does not provide an overwhelmingly better fit than Model 3 ( $\chi^2_{df=1} = 3.676$ ,  
 41  $p = 0.055$ ) so we used the Model 3 (the linear model) because it allowed us to interpolate over  
 42 all temperatures between 4 and 20 °C.

43 When fitting Model 3, there were three highly influential data points in which individuals  
 44 lost infections after having a log zoospore of 8.3, 10.36, and 8.1. Individuals with these large  
 45 losses had similar pre-loss loads at the next swabbing event (Figure 9), leading us to believe that  
 46 these large losses were likely due to experimental error. Therefore, we excluded these points  
 47 when fitting the model.

### 48 **1.4 Initial infection burden function: $G_0(x')$**

49 The various models we fit for the initial function burden function are given in Table 3. The  
 50 normalized residuals of the full model were not significantly different than a normal distribution  
 51 (Shapiro-Wilk test for normality:  $p = 0.827$ ), thereby justifying the assumption of normality for  
 52 the initial infection distribution. Similar to the loss of infection function, there were three outly-  
 53 ing log-zoospore initial loads of 7.15, 8.26, and 11.81, which were the same spurious transitions  
 54 observed in the loss of infection function, but in this case the points were an unrealistic gain in

55 zoospores after the unrealistic loss of zoospores (Figure 9). These points were again excluded  
56 from the analysis. After this exclusion, there was only one transition from 0 to infected at 20  
57 °C. Diagnostic plots for the model used in the main text (given in bold in Table 3) are given in  
58 Figure 3.

### 59 **1.5 Density-independent transmission function: $\phi(T)$**

60 We explored three different density-independent transmission models. In the first model, the  
61 probability of infection was independent of temperature (Model 1). In the second model, tem-  
62 perature was a linear predictor of the probability of infection (Model 2). In the third model,  
63 temperature was a factor predicting the probability of infection. The model with a linear effect  
64 of temperature was the best model based on AIC criteria (Table 4).

## 65 **2 The effect of eviction on the *Bd-Rana muscosa* Integral 66 Projection Model**

67 Given the parameterized density-independent IPM described in the main text, we examined the  
68 effects of eviction (loss of individuals from the model because their predicted future loads are  
69 outside the model range) using the examples and code given in Williams *et al.* (2012). In Table  
70 5, we show the maximum size-dependent eviction value  $\epsilon(x)$  as given by equation 2 in (Williams  
71 *et al.* 2012) for the host-parasite IPM model at four different temperatures. These values are  
72 non-zero, indicating that eviction is occurring in our parameterized IPM with a lower bound of -5  
73 and an upper bound of 18. To assess the effect of eviction on the IPM predictions, we also show  
74 the value  $d\lambda$  which gives the effect of eviction on the predicted population growth rate (Williams  
75 *et al.* 2012). For all temperatures between 4 and 20 °C (4 temperatures shown in Table 5),  $d\lambda$   
76 is very small indicating that despite eviction occurring in the parameterized IPM, it is having  
77 very little effect on the predictions of the IPM. Therefore, we felt confident in interpreting the  
78 IPM with the given upper and lower bounds.

## 79 **3 $R_0$ for host-parasite Integral Projection Models**

### 80 **3.1 Derivation of $R_0$ for IPMs**

81 Calculating  $R_0$  for Integral Projection Models (IPM)s is challenging because IPMs can be used  
82 to represent the dynamics of both microparasites and macroparasites. Therefore,  $R_0$  will need

83 to be computed and understood differently depending on the which type of parasite is being  
84 considered and the structure of the IPM. For microparasites,  $R_0$  is defined as the average number  
85 of secondary infections produced by a typical infectious individual over its infective lifetime  
86 (Diekmann *et al.* 1990). For macroparasites,  $R_0$  is defined as “the number of new female parasites  
87 produced by an average female parasite when there are no density-dependent constraints acting  
88 anywhere in the life cycle of the parasite” (Tompkins *et al.* 2002). We adopt a microparasite  
89 definition of  $R_0$  for the remainder of this discussion, bearing in mind that a host-parasite IPM  
90 could easily be formulated such that the macroparasite definition of  $R_0$  is more appropriate.

91 To define a microparasite  $R_0$  for the host-parasite IPM described in the main text (equations  
92 1 and 2), we start by considering density-dependent transmission such that the probability of  
93 becoming infected in a time step  $t$  is

$$\phi(I(x, t)) = 1 - \exp\left(-\beta \int_L^U I(x, t) dx\right) \quad (3)$$

94 We then note that the host-parasite IPM model can be analogously stated as a (S)usceptible-  
95 (I)nfectious-(S)usceptible model with a continuous  $I(x)$  class. When analyzing the IPM model, it  
96 is standard practice to discretize the IPM into some number of  $n$  bins such that the IPM can  
97 be represented as a matrix model with a large number of classes (Coulson 2012). This could  
98 be thought of as re-expressing the SIS model with a continuous I class as an  $S$ - $I_1$ - $I_2$ - $I_3$ -...- $I_n$ -  
99  $S$  model with many discrete I classes. Using this discretized approach,  $R_0$  can be calculated  
100 using the methods described in Allen & van den Driessche (2008) and Klepac & Caswell (2011).  
101 Following the notation of Klepac & Caswell (2011), the partial matrix representation of the IPM  
102 that we use to calculate  $R_0$  is given by

$$\begin{bmatrix} S \\ \mathbf{I} \end{bmatrix} (t+1) = \begin{bmatrix} 0 & 0 \\ M(\mathbf{I}) & N(\mathbf{I}) \end{bmatrix} \begin{bmatrix} S \\ \mathbf{I} \end{bmatrix} (t) = m(\mathbf{I}(\mathbf{t}))S(t) + \mathbf{U}\mathbf{I}(\mathbf{t}) = \mathbf{I}(t+1) \quad (4)$$

103 where the top two entries are 0 because they are not needed when calculating  $R_0$  (i.e.  $R_0$  only  
104 depends upon individuals entering the infected classes or individuals that are already in the  
105 infected classes), not because they are actually 0 in the IPM model (Oli *et al.* 2006; Klepac &  
106 Caswell 2011).  $\mathbf{I}$  is a vector of length  $n$  that gives the various infected parasite load classes.  
107  $m(\mathbf{I})$  is a vector of length  $n$  where each element gives the probability of transitioning from class  
108  $S$  (uninfected/susceptible) to an infected class with parasite load  $x_i$  where  $i$  is between 1 and  $n$ .  
109 We use this notation loosely as it is really the probability of transitioning to an infected class  
110 with a load in the interval  $x_i \pm \Delta/2$  where  $x_i$  is the midpoint of this interval.  $\Delta$  arises from

111 using the midpoint rule to evaluate the IPM (Easterling *et al.* 2000). Each  $i$ th element of the  
 112 vector  $m(\mathbf{I})$  is given by

$$m_i(\mathbf{I}(t)) = s_0 \phi(\mathbf{I}(t)) G_0(x_i) \Delta \quad (5)$$

113 where  $s_0$  represents the probability of an uninfected individual surviving and  $G_0(x_i)$  is the  
 114 probability density function of transitioning from uninfected (S) to infected with a load of  $x_i$  as  
 115 defined in the main text.  $\Delta$  is needed to convert the probability density  $G_0(x_i)$  to a probability.

116  $\mathbf{U}$  is a  $n \times n$  matrix that specifies the transition probabilities of infected individuals among  
 117 different load classes. The element in the  $i$ th row and the  $j$ th column of the matrix is given by

$$u_{ij} = s(x_j)(1 - l(x_j))G(x_i, x_j)\Delta \quad (6)$$

118 which gives the probability of an individual in the  $j$ th load class surviving ( $s(x_j)$ ), not losing its  
 119 infection ( $1 - l(x_j)$ ), and transitioning to the load class of  $x_i$  in a time step ( $G(x_i, x_j)$ ).

120 To calculate  $R_0$ , we then linearize  $\mathbf{I}(t + 1)$  about a vector  $\mathbf{n}^*$  which we set to be a host  
 121 population with only susceptibles (Rohani *et al.* 2009; Klepac & Caswell 2011),  $N^* = [S^* \mathbf{0}]$   
 122 where  $\mathbf{0}$  is a vector of zeros of length  $n$ . We then compute the Jacobian matrix evaluated at  $\mathbf{n}^*$

$$\mathbf{J} = \left. \frac{d\mathbf{I}(t+1)}{d\mathbf{I}(t)} \right|_{\mathbf{n}^*} \quad (7)$$

123 which allows us to compute  $R_0$  (Klepac & Caswell 2011).

124 In the above case, one could compute  $\mathbf{J}$  as follows. First compute,  $\left. \frac{d\mathbf{U}\mathbf{I}(t)}{d\mathbf{I}(t)} \right|_{\mathbf{n}^*}$  which is simply  
 125  $\mathbf{U}$ . This is just the transition matrix for the infected individuals of various load classes. Next,  
 126 compute  $\left. \frac{dm(\mathbf{I}(t))}{d\mathbf{I}(t)} \right|_{\mathbf{n}^*}$ , which results in a column vector  $\mathbf{m}$  of length  $n$  where each element is  
 127 given by

$$\frac{dm_i(\mathbf{I}(t))}{d\mathbf{I}(t)} = \beta s_0 S^* G_0(x_i) \Delta \quad (8)$$

128 Now let  $\mathbf{M}$  be an  $n$  by  $n$  matrix with each column being equal to  $\mathbf{m}$  so that  $\mathbf{J} = \mathbf{M} + \mathbf{U}$ .  $R_0$   
 129 is then given by

$$R_0 = \max \text{eig}(\mathbf{M}(\mathbf{1} - \mathbf{U})^{-1}) \quad (9)$$

130 where  $\mathbf{1}$  is the identity matrix and  $\mathbf{M}$  is equivalent to the “fertility” matrix described in Klepac  
 131 & Caswell (2011). “max eig” refers to the maximum eigenvalue of this matrix.

132 A helpful approximation of this result can be derived by “collapsing” the various infected  
 133 classes  $\mathbf{I}(t)$  into a single infected class  $I(t)$ . The model is then reduced to a simple SIS model  
 134 with the following transition matrix (where we again include 0s where the transitions do not  
 135 affect the calculation of  $R_0$ )

$$\begin{bmatrix} S \\ I \end{bmatrix} (t+1) = \begin{bmatrix} 0 & 0 \\ s_0\phi(I(t)) & \bar{s}_I(1-\bar{l}) \end{bmatrix} \begin{bmatrix} S \\ I \end{bmatrix} (t) = s_0\phi(I(t))S(t) + \bar{s}_I(1-\bar{l})I(t) = I(t+1) \quad (10)$$

136 where  $\bar{s}_I$  is the survival probability for an average infected individual and  $\bar{l}$  is the probability of  
 137 an average infected individual losing an infection.

138 Using the same steps as above the resulting value of  $R_0$  is

$$R_0 = \frac{\beta s_0 S^*}{1 - \bar{s}_I(1 - \bar{l})} \quad (11)$$

### 139 3.2 Application of $R_0$ to *Bd-R. muscosa*

140 Using equations 9 and 11, we computed  $R_0$  for the *Bd-Rana muscosa* system described in the  
 141 main text as an illustrative example. Note that in this example, we assumed density dependent  
 142 transmission without any probability of acquiring an infection from the environmental reservoir  
 143 as we do in the main text. We make this simplification here because without accounting for  
 144 the decay of the pathogen in the environment, an  $R_0$  that accounts for both transmission due  
 145 to the environment and other infected individuals would be trivially  $\infty$  (Rohani *et al.* 2009).  
 146 An environmental reservoir could be more explicitly incorporated in the host-parasite IPM by  
 147 including an additional state variable  $Z(t)$  which gives the total number of parasites in the  
 148 environment at time  $t$ .

149 We set the transmission coefficient  $\beta = 9.82e10^{-4}$  which was the transmission coefficient  
 150 estimated in Rachowicz & Briggs (2007) for density-dependent transmission in *Bd-Rana muscosa*  
 151 and assumed an initial susceptible population of 100 frogs ( $S^* = 100$ ). Otherwise, all values  
 152 for the hosts-parasite IPM were as given in Table 1 the main text. To compute  $\bar{s}_I$  and  $\bar{l}$  in  
 153 equation 11, we assumed a density-independent host-parasite IPM (equations 7 and 8 in the  
 154 main text) with  $\phi = 1 - \exp(-\beta)$  and calculated the stable parasite load distribution conditional  
 155 on infection ( $p(x)$ ) giving the probability density of having some parasite load  $x$ . We used this  
 156 probability distribution to compute the expected survival and loss probability of an average  
 157 infected individual as  $\bar{s}_I = \int_L^U s(x)p(x)dx$  and  $\bar{l} = \int_L^U l(x)p(x)dx$ , respectively.

158 Figure 10 shows the temperature dependence of  $R_0$  for this illustrative example parameterized  
 159 from the *Bd-R. muscosa* IPM. Notice that the approximation given by equation 11 is nearly  
 160 identical to the predictions for  $R_0$  from equation 9. At low temperatures,  $R_0$  is less than 1  
 161 and proceeds to increase as temperature increases. At approximately 12 °C,  $R_0 \approx 1$ . However,  
 162 around 17 °C the  $R_0$  reaches a maximum and begins to decline. This is due to the average  
 163 probability of losing an infection  $\bar{l}$  quickly and non-linearly decreasing as temperature increases  
 164 and the average probability of surviving with an infection  $\bar{s}_I$  holding relatively constant with  
 165 temperature and then rapidly decreasing as temperature increases past 17 °C.

## 166 References

- 167 Allen, L.J. & van den Driessche, P. (2008) The basic reproduction number in some discrete-time  
 168 epidemic models. *Journal of Difference Equations and Applications*, **14**, 1127–1147.
- 169 Coulson, T. (2012) Integral projections models, their construction and use in posing hypotheses  
 170 in ecology. *Oikos*, **121**, 1337–1350.
- 171 Diekmann, O., Heesterbeek, J.A.P. & Metz, J.A.J. (1990) On the definition and the compu-  
 172 tation of the basic reproduction ratio  $R_0$  in models for infectious diseases in heterogeneous  
 173 populations. *Journal of Mathematical Biology*, **28**, 365–382.
- 174 Easterling, M.R., Ellner, S.P. & Dixon, P.M. (2000) Size-specific sensitivity: applying a new  
 175 structured population model. *Ecology*, **81**, 694–708.
- 176 Klepac, P. & Caswell, H. (2011) The stage-structured epidemic: Linking disease and demography  
 177 with a multi-state matrix approach model. *Theoretical Ecology*, **4**, 301–319.
- 178 Oli, M.K., Venkataraman, M., Klein, P.A., Wendland, L.D. & Brown, M.B. (2006) Population  
 179 dynamics of infectious diseases: A discrete time model. *Ecological Modelling*, **198**, 183–194.
- 180 Rachowicz, L.J. & Briggs, C.J. (2007) Quantifying the disease transmission function: effects of  
 181 density on *Batrachochytrium dendrobatidis* transmission in the mountain yellow-legged frog  
 182 *Rana muscosa*. *The Journal of Animal Ecology*, **76**, 711–21.
- 183 Rohani, P., Breban, R., Stallknecht, D.E. & Drake, J.M. (2009) Environmental transmission of  
 184 low pathogenicity avian influenza viruses and its implications for pathogen invasion. *Proceed-  
 185 ings of the National Academy of Sciences of the United States of America*, **106**, 10365–10369.
- 186 Tompkins, D.M., Dobson, A.P., Arneberg, P., Begon, M., Cattadori, I.M., Greenman, J.V.,  
 187 Heesterbeek, J.A.P., Hudson, P.J., Newborn, D., Pugliese, A., Rizzoli, A.P., Rosa, R., Rosso,  
 188 F. & Wilson, K. (2002) Parasites and host population dynamics. P.J. Hudson, A. Rizzoli, B.T.  
 189 Grenfell, H. Heessterbeck & A.P. Dobson, eds., *The Ecology of Wildlife Diseases*, chapter 3,  
 190 pp. 45–62. Oxford University Press, Oxford.
- 191 Vredenburg, V.T., Knapp, R.A., Tunstall, T.S. & Briggs, C.J. (2010) Dynamics of an emerg-  
 192 ing disease drive large-scale amphibian population extinctions. *Proceedings of the National  
 193 Academy of Sciences of the United States of America*, **107**, 9689–94.
- 194 Williams, J.T., Miller, T.E.X. & Ellner, S.P. (2012) Avoiding unintentional eviction from integral  
 195 projection models. *Ecology*, **93**, 2008–2014.

Table 1: Candidate models for the growth function  $G(x', x)$ . All models assumed a normal distribution for the response variable.  $T$  is temperature,  $x$  is log zoospore size at time  $t$ , and  $r_i$  represents a random effect of an individual frog. The model with the bold AIC value is the model used in the main text.

| Model | Mean Component                                   | Variance Component                         | AIC           |
|-------|--------------------------------------------------|--------------------------------------------|---------------|
| 1     | $\mu(x, T) = b_0 + b_1x + b_2T$                  | $\sigma^2$                                 | 1067.8        |
| 2     | $\mu(x, T) = b_0 + b_1x + b_2T$                  | $\sigma^2(x) = \nu \exp(2cx)$              | <b>1060.0</b> |
| 3     | $\mu(x, T) = b_0 + b_1x + b_2T$                  | $\sigma^2(x, T) = \nu \exp(2c_1x + 2c_2T)$ | 1060.7        |
| 4     | $\mu(x, T)_i = b_0 + b_1x + b_2T + r_i$          | $\sigma^2(x) = \nu \exp(2cx)$              | 1061.8        |
| 5     | $\mu(x, T) = b_0 + b_1x + b_2T + b_3xT$          | $\sigma^2(x) = \nu \exp(2cx)$              | 1061.0        |
| 6     | $\mu(x, T) = b_0 + b_1x + b_2T + b_3xT + b_4x^2$ | $\sigma^2(x) = \nu \exp(2cx)$              | 1045.3        |
| 7     | $\mu(x, T) = b_0 + b_1x + b_2T + b_3x^2$         | $\sigma^2(x) = \nu \exp(2cx)$              | 1049.3        |



Table 2: Candidate models for the loss of infection function  $l(x)$ . All models assumed a binomial distribution for the response variable.  $T$  is temperature,  $T_i$  is temperature as a factor, and  $x$  is log zoospore load at time  $t$ . The model with the bold AIC value is the model used in the main text.

| <b>Model</b> | <b>Mean Component</b>                               | <b>AIC</b>   |
|--------------|-----------------------------------------------------|--------------|
| 1            | $\text{logit}(l(x)) = b_0 + b_1x$                   | 193.0        |
| 2            | $\text{logit}(l(T)) = b_0 + b_1T$                   | 202.1        |
| 3            | $\text{logit}(l(x, T)) = b_0 + b_1x + b_2T$         | <b>180.4</b> |
| 4            | $\text{logit}(l(x, T)) = b_0 + b_1x + b_2T + b_3xT$ | 182.4        |
| 5            | $\text{logit}(l(x, T))_i = b_0 + b_1x + T_i$        | 178.7        |

Table 3: Candidate models for the initial infection burden function  $G_0(x')$ . All models assumed a normal distribution for the response variable.  $T$  is temperature,  $T_i$  is temperature as a factor, and  $x$  is log zoospore load at time  $t$ . The model with the bold AIC value is the model used in the main text.

| Model | Mean Component         | Variance Component            | AIC          |
|-------|------------------------|-------------------------------|--------------|
| 1     | $\mu(T) = b_0 + b_1T$  | $\sigma^2$                    | 149.2        |
| 2     | $\mu(T)_i = b_0 + T_i$ | $\sigma^2$                    | 148.5        |
| 3     | $\mu(T) = b_0 + b_1T$  | $\sigma^2(T) = \nu \exp(2cT)$ | <b>145.2</b> |

Table 4: Candidate models for the density-independent transmission function  $\phi(T)$ . All models assumed a binomial distribution for the response variable.  $T$  is temperature and  $T_i$  is temperature as a factor. The model with the bold AIC value is the model used in the main text.

| <b>Model</b> | <b>Mean Component</b>                 | <b>AIC</b>   |
|--------------|---------------------------------------|--------------|
| 1            | $\text{logit}(\phi) = b_0$            | 198.0        |
| 2            | $\text{logit}(\phi(T)) = b_0 + b_1 T$ | <b>193.9</b> |
| 3            | $\text{logit}(\phi(T)_i) = b_0 + T_i$ | 195.8        |

Table 5: Table shows the effect of eviction on the *Batrachocytrium dendrobatidis-Rana muscosa* Integral Projection Model described in the main text at 4 different temperatures.  $\epsilon(x)$  specifies the maximum value of eviction occurring in the IPM model as given by equation 2 in Williams *et al.* (2012). A value of zero indicates no eviction is occurring while a non-zero value indicates that eviction is occurring in the IPM.  $d\lambda$  gives the effect of this eviction on the predicted population growth rate. In other words, how much would this growth rate change if no eviction was occurring. Despite eviction occurring in the *Bd-R. muscosa* IPM, it is having little effect on the predicted population growth rate.

| <b><i>Bd-R. muscosa</i> IPM</b> | $\epsilon(x)$ | $d\lambda$ |
|---------------------------------|---------------|------------|
| at 4 °C                         | 0.32          | 2.26e-05   |
| at 10 °C                        | 0.26          | 2.74e-05   |
| at 15 °C                        | 0.22          | 2.52e-05   |
| at 20 °C                        | 0.18          | 1.45e-08   |

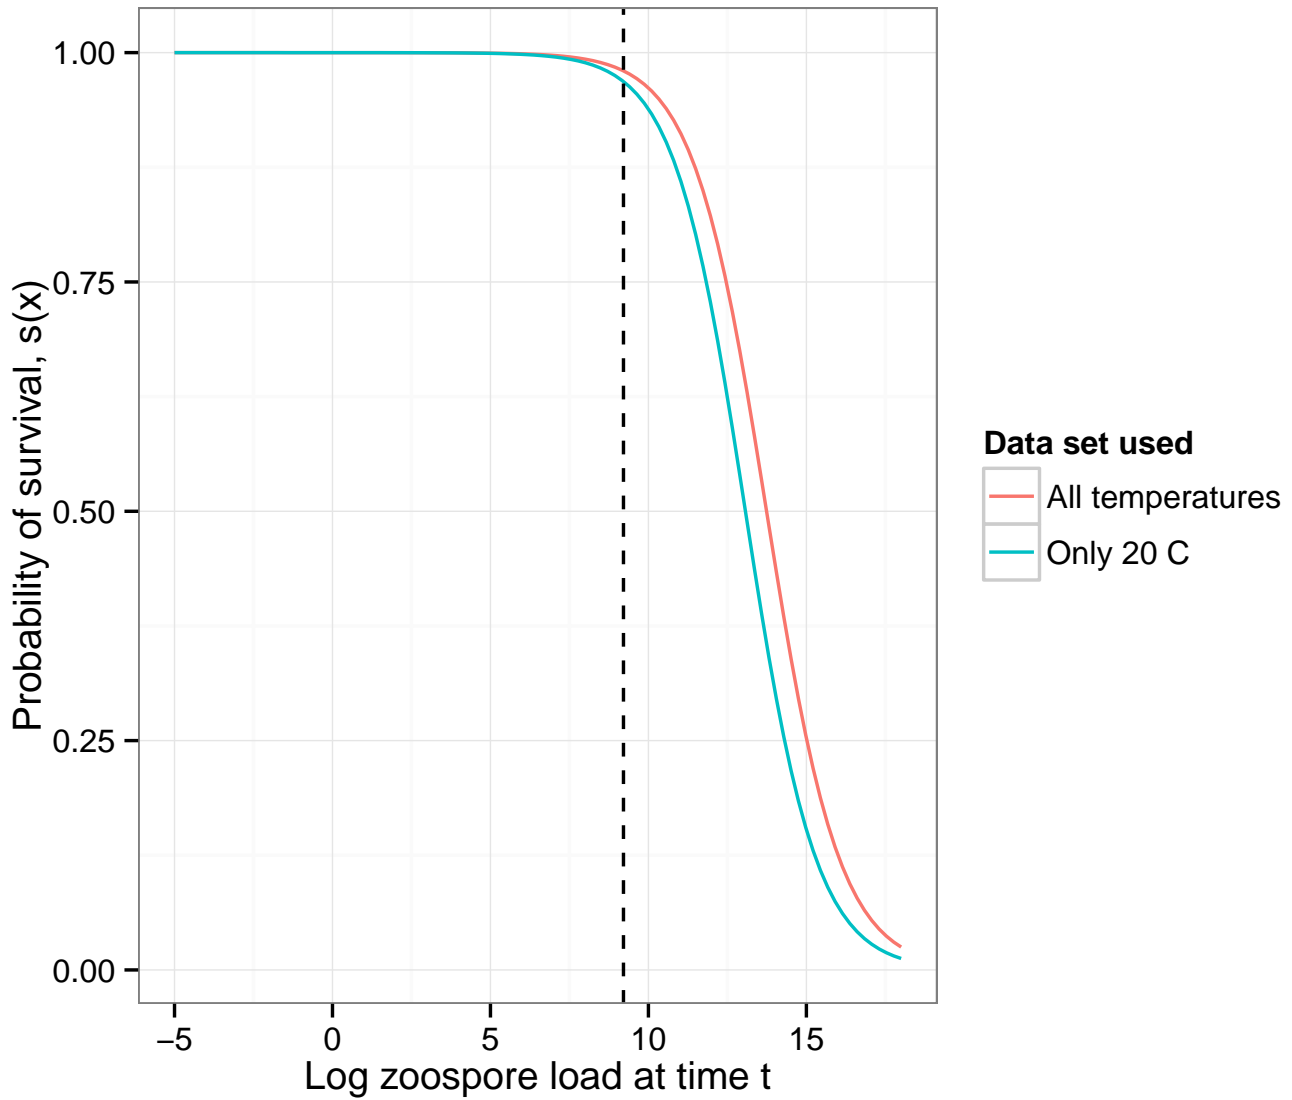

Figure 1: Comparison of survival functions fit from two different subsets of the data. The blue line shows the survival function used in the Integral Projection Model (IPM) analysis described in the main text and only includes data from individuals housed at 20 °C. The red line shows an alternative survival function that was parameterized using the data from all temperatures used in the experiment (4, 12, 20 °C). The dashed vertical line gives the 10,000 zoospore threshold reported by Vredenburg *et al.* (2010), which gives an approximate threshold at which *R. muscosa* begins to experience *Bd*-induced mortality in the field. While the survival curves from the two models are very similar, our elasticity analysis shows that even this small difference can have large effects on whether an *R. muscosa* population can persist through an epizootic at high temperatures.

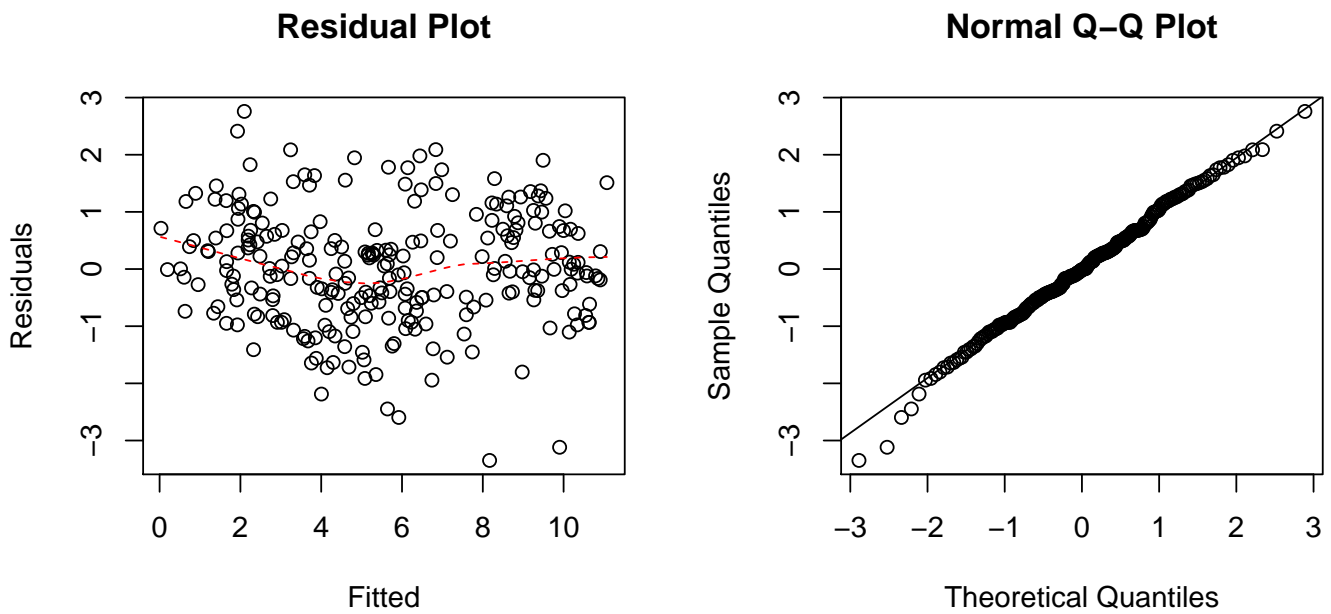

Figure 2: Diagnostic plots for the Model 2 in Table 1. The noticeable pattern in the residual plot (red line) can be accounted for with a quadratic term in the growth function (Model 6, Table 1). As discussed in the subsection *Growth Function:  $G(x', x)$*  we chose to use this linear model for the growth function, but explored the effects of the alternative, non-linear growth function on the IPM predictions.

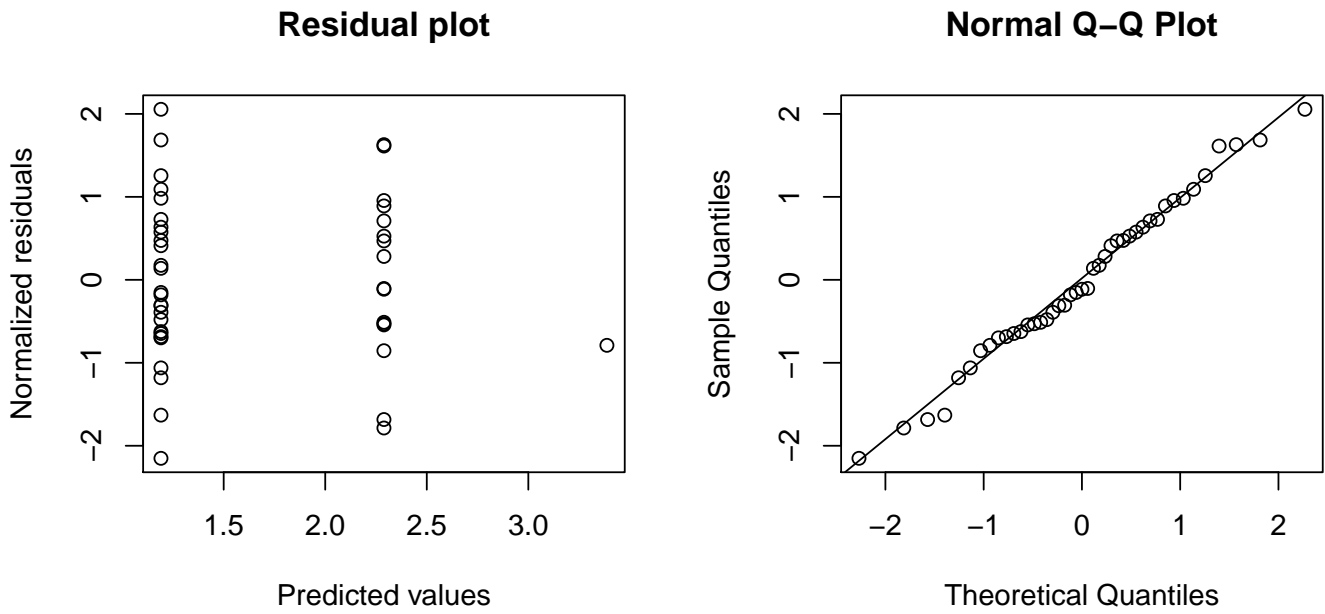

Figure 3: Diagnostic plots for the Model 3 in Table 3. The data point to the far right in the residual plot shows the single data point for a transition of an individual from 0 to infected at a temperature of 20 °C.

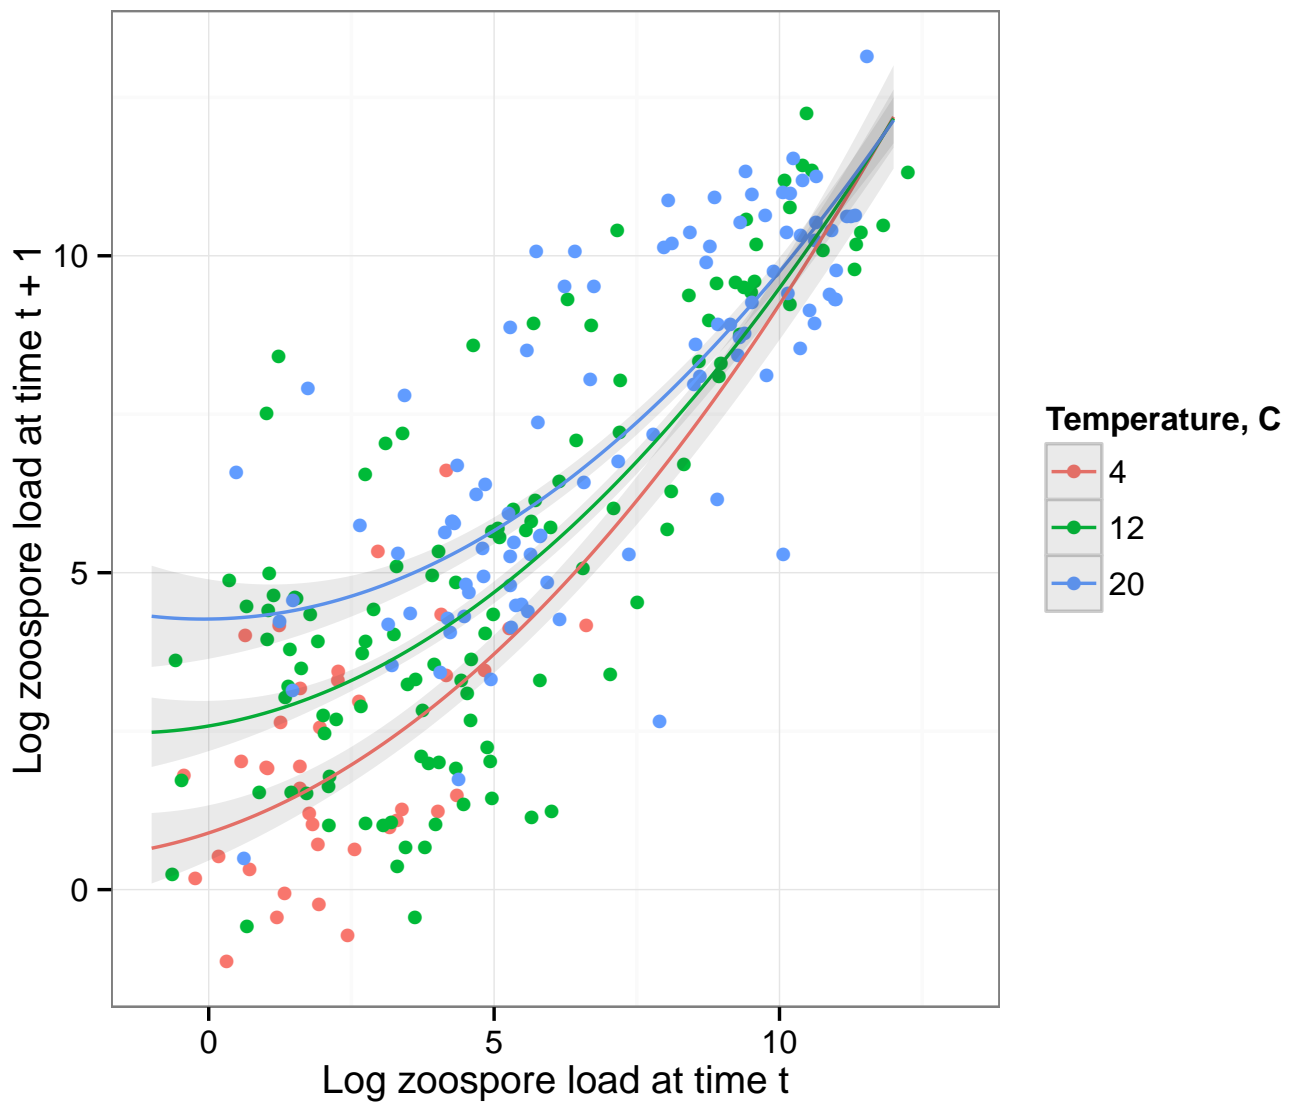

Figure 4: The best fit quadratic empirical growth function given by Model 6 in Table 1. As log-zoospore load at time  $t$  decreases the growth function flattens and eventually begins to increase for small enough values of log-zoospore load at time  $t$ .



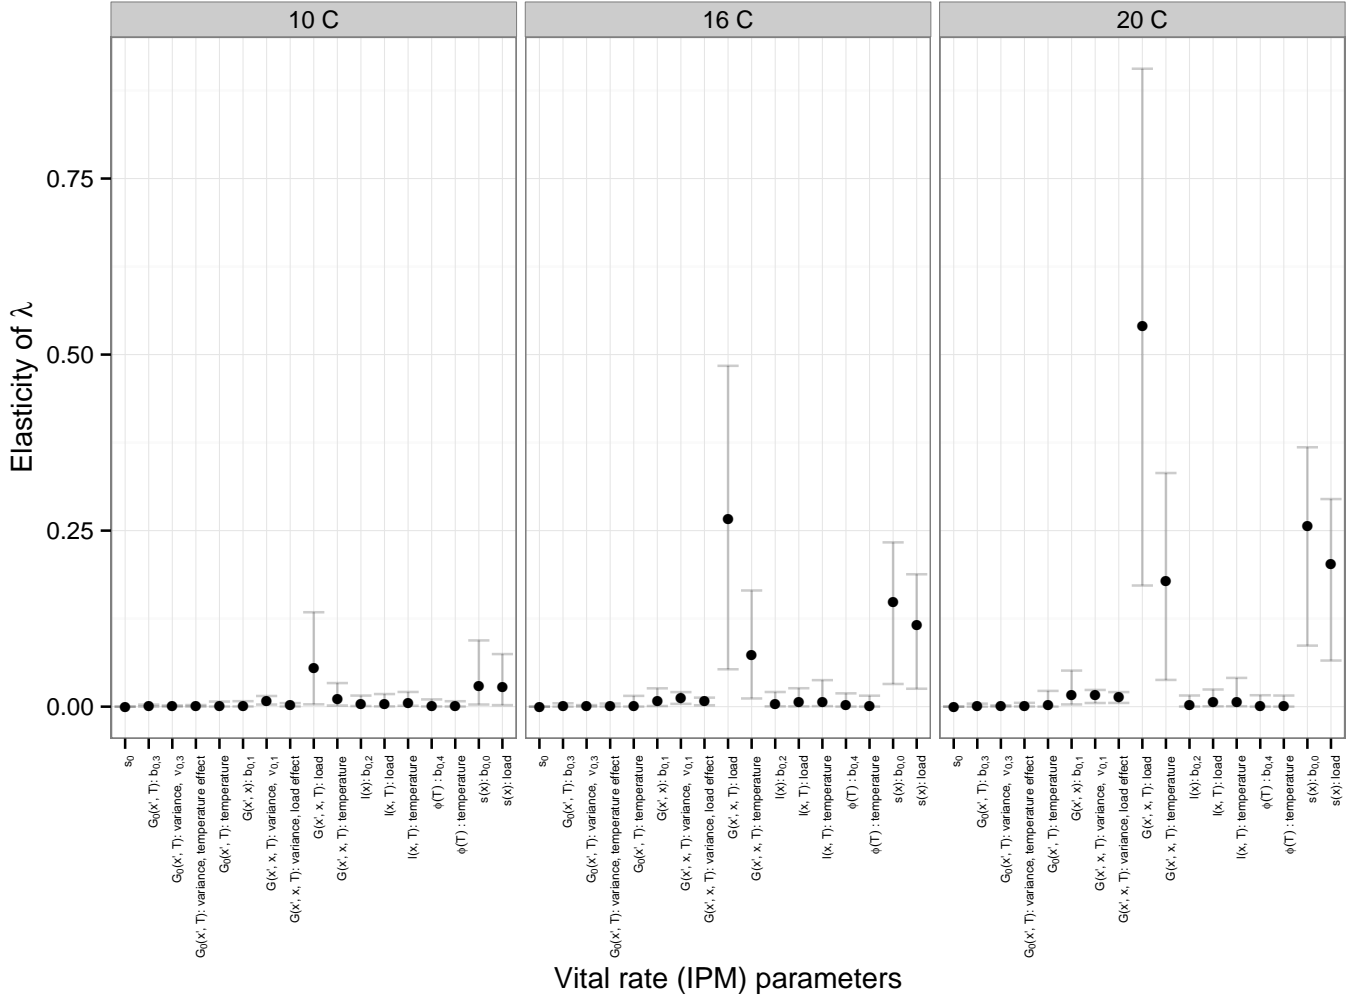

Figure 5: A local elasticity analysis of the population growth rate  $\lambda$  to the vital rate parameters used in the *Bd-Rana muscosa* IPM. The x axis gives all the vital rate parameters used in the *Bd-R. muscosa* IPM model. Each x axis label specifies the vital rate function to which a parameter belongs as well as the identity of that parameter. The parameters labeled as  $b_{0,j}$  represent the intercepts of the given vital rate functions. The parameters labeled as load and temperature identify the load and temperature parameters of the given vital rate function. The parameters specified as variance refer to the parameters affecting the variance of the vital rate function, where  $\nu_{0,j}$  gives the variance of the vital rate function when the effect of other covariates on the variance is 0. The points represent the median elasticity of  $\lambda$  to a given parameter based on 1000 simulations and the error bars give the first and third quartiles of the uncertainty around this elasticity.

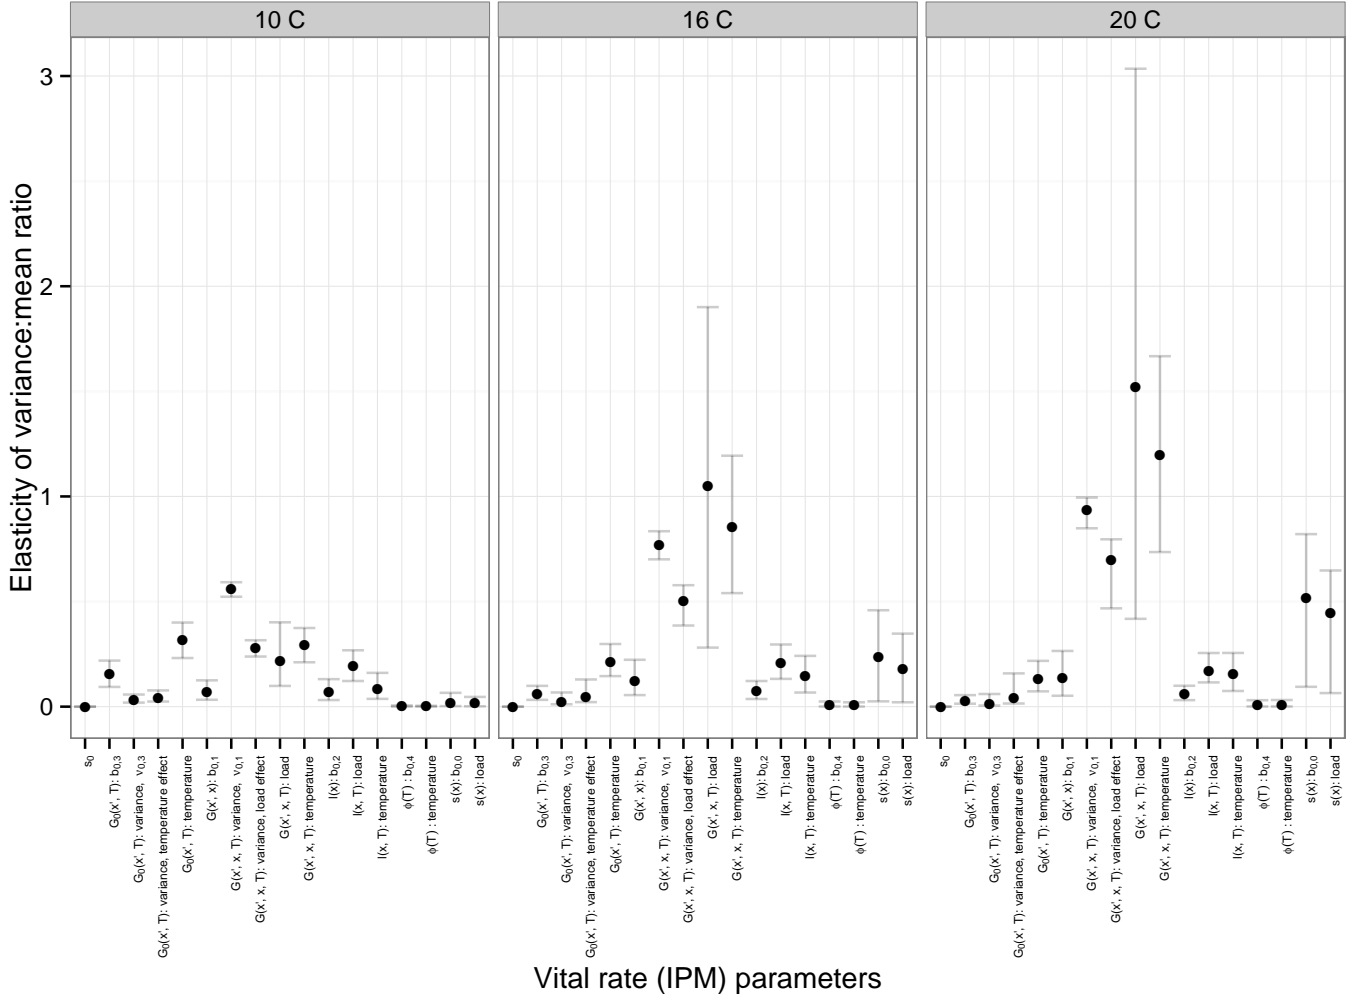

Figure 6: A local elasticity analysis of the variance to mean ratio of the *Bd* load distribution to the vital rate parameters used in the *Bd-Rana muscosa* IPM. The x axis gives all the vital rate parameters used in the *Bd-R. muscosa* IPM model. Each x axis label specifies the vital rate function to which a parameter belongs as well as the identity of that parameter. The parameters labeled as  $b_{0,j}$  represent the intercepts of the given vital rate functions. The parameters labeled as load and temperature identify the load and temperature parameters of the given vital rate function. The parameters specified as variance refer to the parameters affecting the variance of the vital rate function, where  $\nu_{0,j}$  gives the variance of the vital rate function when the effect of other covariates on the variance is 0. The points represent the median elasticity of the variance to mean ratio to a given parameter based on 1000 simulations and the error bars give the first and third quartiles of the uncertainty around this elasticity.

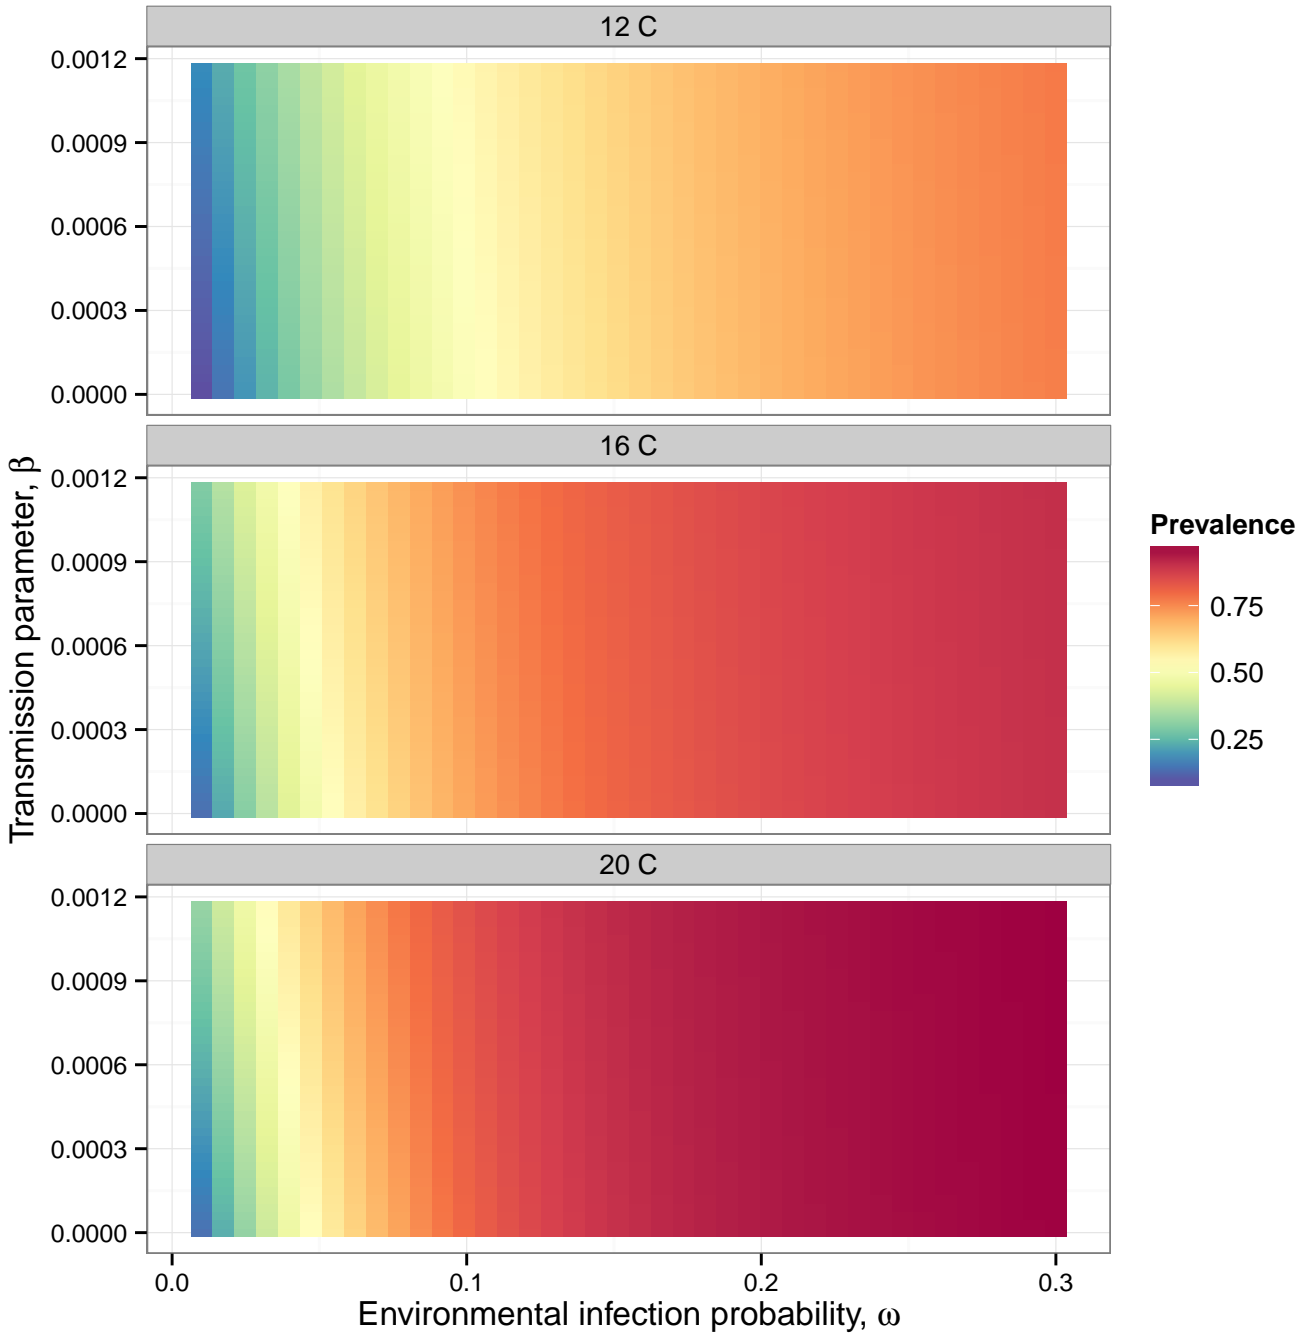

Figure 7: Prevalence of *Bd* at the end of a 120 day epizootic given different transmission coefficients ( $\beta$ ) and environmental infection probabilities ( $\omega$ ) for the density-dependent transmission function. This plot shows 40 x 40 systematically chosen pairs of  $\beta$  and  $\omega$  for which the *Bd*-prevalence dynamics were examined. Each panel shows the change in *Bd* prevalence in *Rana muscosa* populations with the different parameter combinations for a given temperature between 12 and 20 °C.

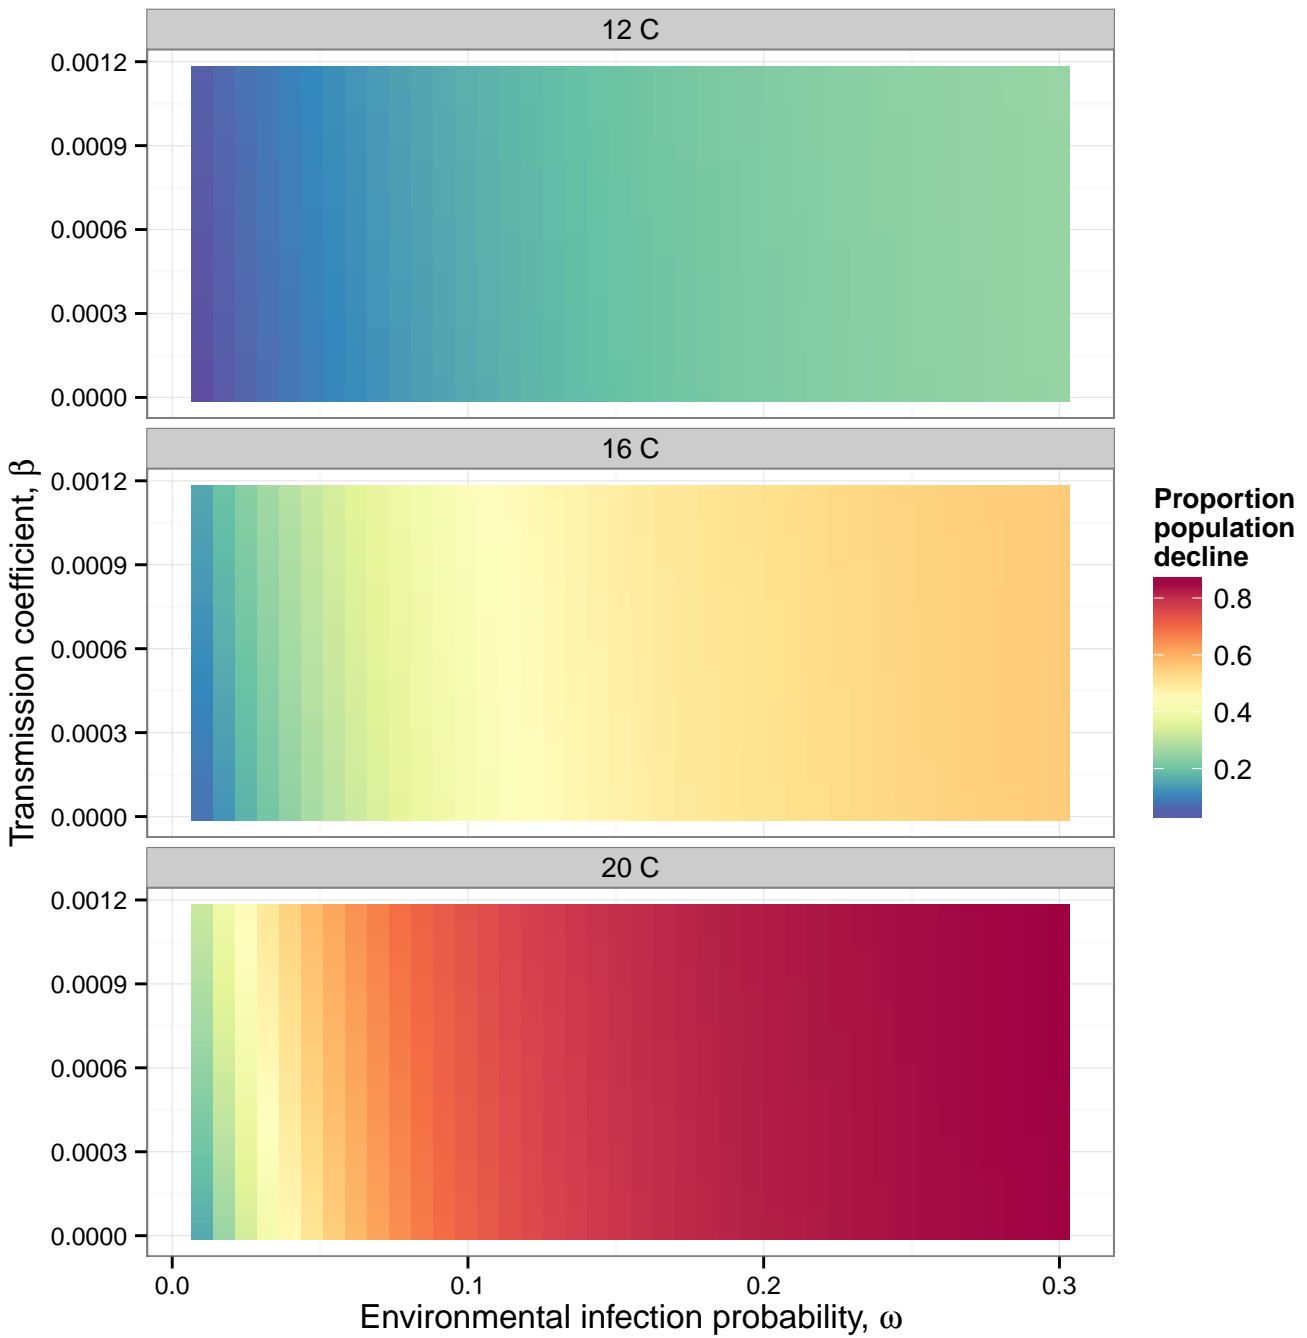

Figure 8: Proportional population loss of *Rana muscosa* at the end of a 120 day epizootic given different transmission coefficients ( $\beta$ ) and environmental infection probabilities ( $\omega$ ) for the density-dependent transmission function. This plot shows 40 x 40 systematically chosen pairs of  $\beta$  and  $\omega$  for which the population dynamics were examined. Each panel shows the change in proportional population loss for *R. muscosa* with the different parameter combinations for a given temperature between 12 and 20 °C.

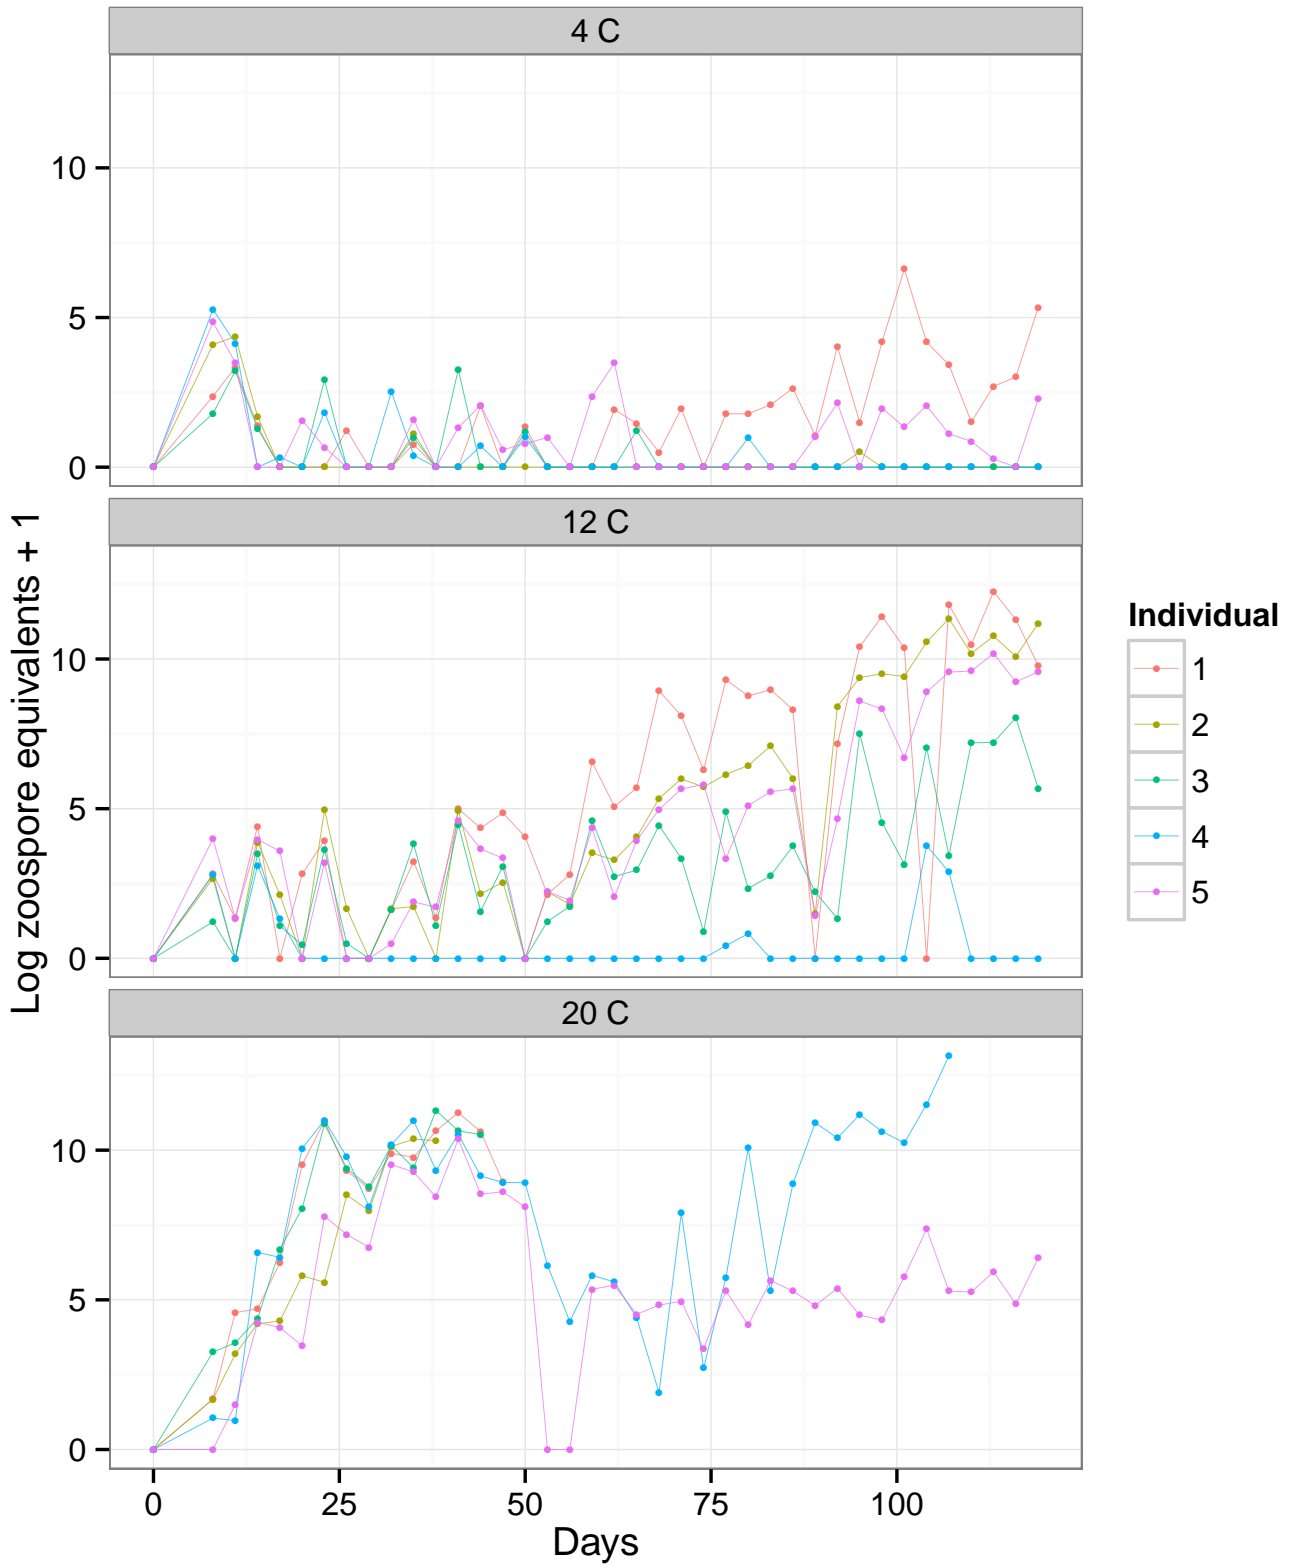

Figure 9: Infection trajectories of individual *Rana muscosa* housed at 4, 12, and 20 °C. Each line represents the *Bd* load trajectory of a particular *Rana muscosa* individual.

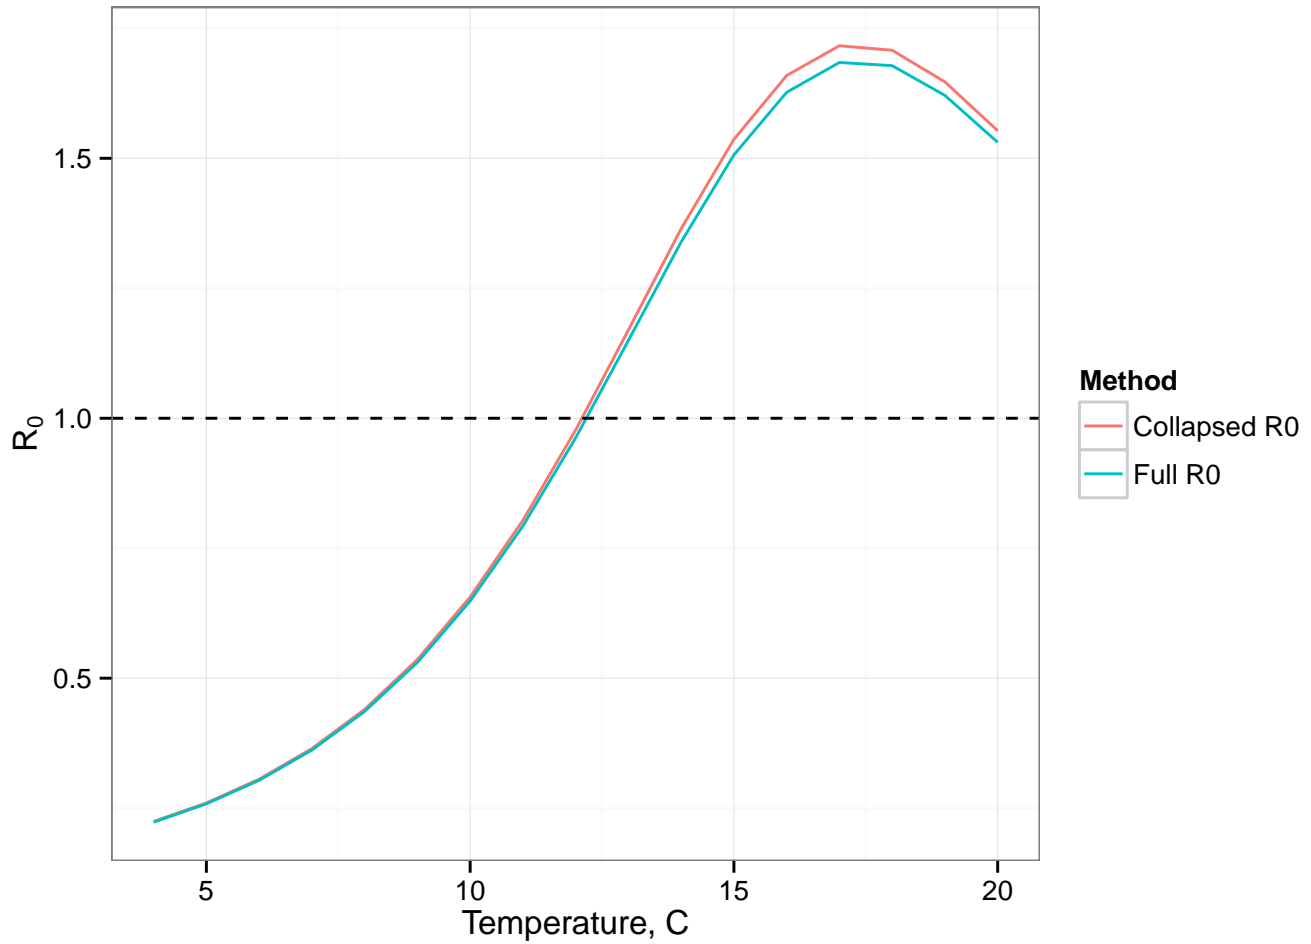

Figure 10: Plots of  $R_0$  for a *Rana muscosa*-*Bd* IPM with density dependent transmission parameterized based on the parameters provided in Table 1 in the main text. The only parameter that was not from Table 1 was the transmission coefficient  $\beta$  which was set to be  $9.82e10^{-4}$  based on Rachowicz & Briggs (2007). The number of susceptible individuals in the initial population was set to  $S^* = 100$ .  $R_0$  was computed using both equation 9 (the blue line, Full  $R_0$ ) and equation 11 (the red line, Collapsed  $R_0$ )
